# Supplementary material for: Ventrolateral prefrontal cortex in macaques guides decisions in different learning contexts
Source: PubMed Central journal article supplement — bioRxiv. 2024 Sep 19:2024.09.18.613767. Preprint. [Version 1] doi: 10.1101/2024.09.18.613767 (PMC11429923; doi:10.1101/2024.09.18.613767), 2024-09-19
Supplement: NIHPP2024.09.18.613767V1-supplement-1.pdf [file NIHPP2024.09.18.613767V1-supplement-1.pdf]

836

*Supplementary Information for*

837

**Ventrolateral prefrontal cortex in macaques guides decisions in**

838

**different learning contexts**

839

840

Atsushi Fujimoto<sup>1,2#\*</sup>, Catherine Elorette<sup>1,2#</sup>, Satoka H. Fujimoto<sup>1,2</sup>, Lazar Fleyshe<sup>5</sup>,

841

Brian E. Russ<sup>1,3,4+</sup>, and Peter H. Rudebeck<sup>1,2+\*</sup>

842

843

**Author affiliations:**

844

<sup>1</sup> Nash Family Department of Neuroscience and Friedman Brain Institute, Icahn School of  
845 Medicine at Mount Sinai, One Gustave L. Levy Place, New York, NY 10029

846

<sup>2</sup> Lipschultz Center for Cognitive Neuroscience, Icahn School of Medicine at Mount Sinai, One  
847 Gustave L. Levy Place, New York, NY, 10029

848

<sup>3</sup> Center for Biomedical Imaging and Neuromodulation, Nathan Kline Institute, 140 Old  
849 Orangeburg Road, Orangeburg, NY 10962

850

<sup>4</sup> Department of Psychiatry, New York University at Langone, One, 8, Park Ave, New York, NY  
851 10016

852

<sup>5</sup> BioMedical Engineering and Imaging Institute, Icahn School of Medicine at Mount Sinai, One  
853 Gustave L. Levy Place, New York, NY 10029

854

855

<sup>#</sup> These authors contributed equally to this work

856

<sup>+</sup> Joint last author

857

858

**\* Correspondence:**

859

Atsushi Fujimoto and Peter H. Rudebeck

860 atsushi.fujimoto@mssm.edu or peter.rudebeck@mssm.edu

861

862 **Supplementary Figures 1-5**

863 **Supplementary Tables 1-2**

864

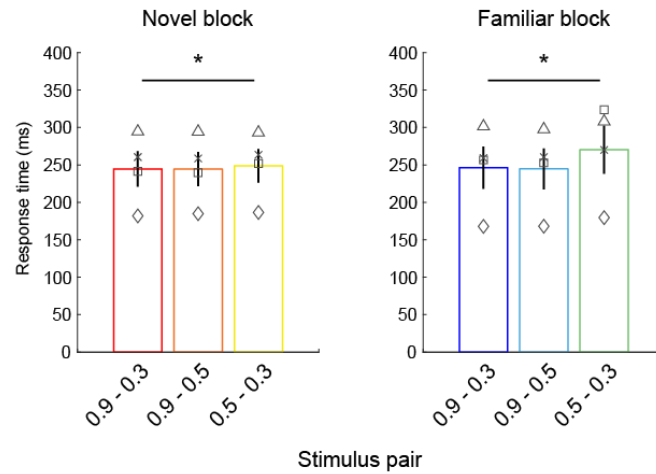

865

866 **Supplementary Figure 1. Response time (RT) of monkeys.** Bar graphs show average and SEM  
867 of RT for each stimulus pair in novel (left) and familiar (right) blocks. Symbols represent each  
868 animal. Asterisks indicate significant main effect of stimulus pair (\* $p < 0.05$ , 2-way repeated-  
869 measures ANOVA).

870

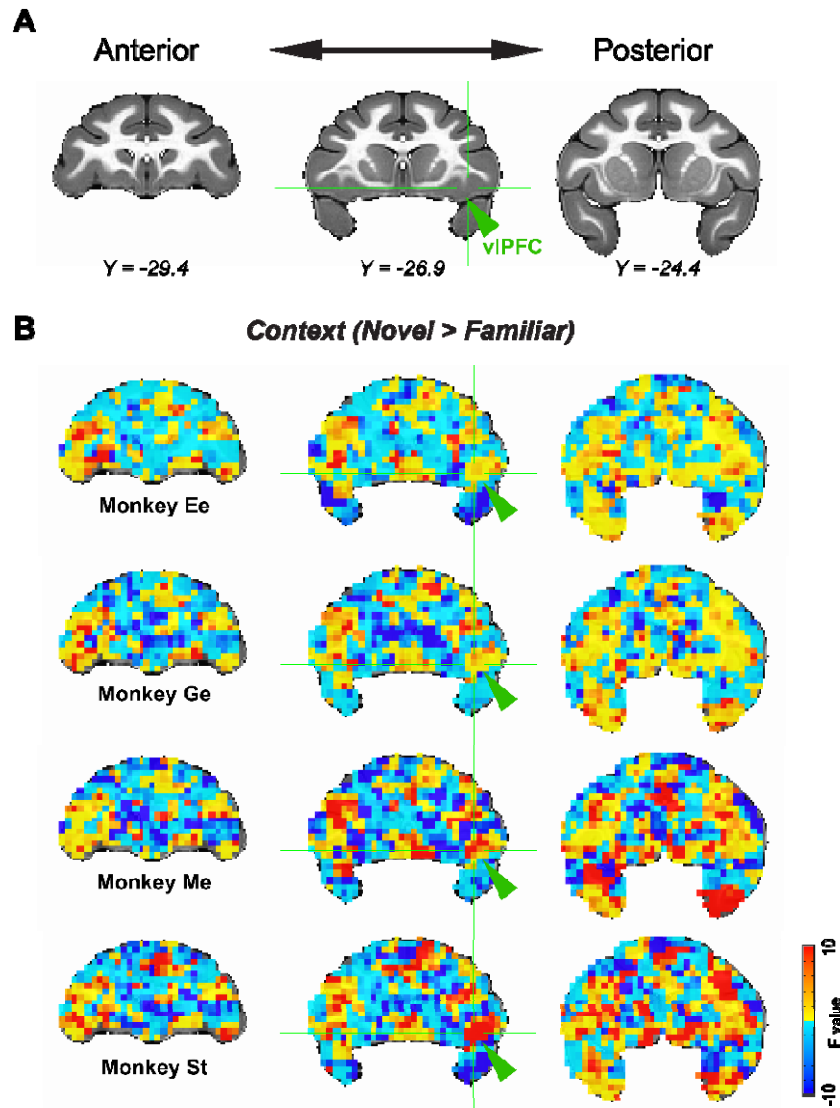

871

872 **Supplementary Figure 2. Context coding in individual monkeys.** (A) Anatomical templates  
873 showing coronal slices around vIPFC ROI. (B) Unthresholded map of F-stats superimposed on  
874 the anatomical templates in (A). The data for each animal is shown in each row. Crosshairs and  
875 arrowheads indicate the peak coordinates of vIPFC ROI used in time-course analyses.

876

***vIPFC-FC analysis, Context (Novel > Familiar)***

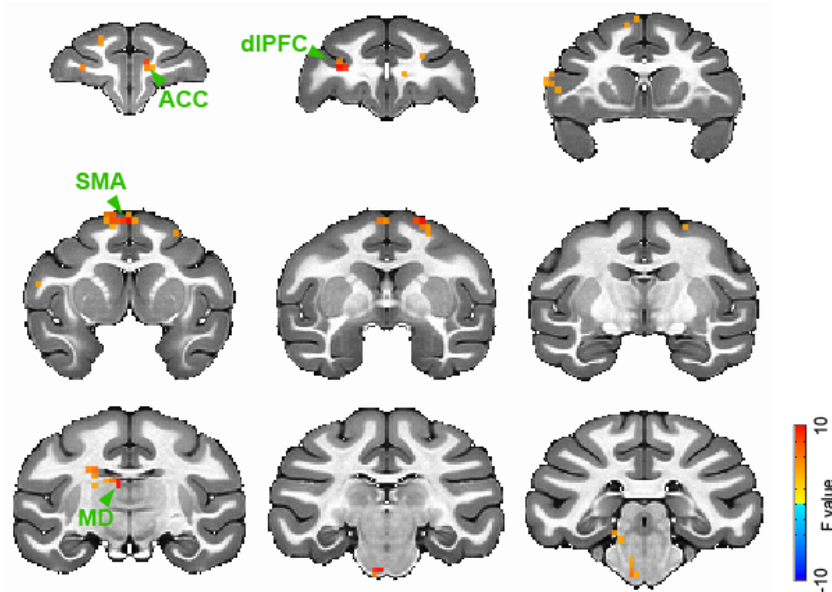

F > 3.0 and cluster size >14 voxels

877

878 **Supplementary Figure 3. Functional connectivity analysis using vIPFC seed.** Whole-brain  
879 map of F-stats in significant clusters ( $p < 0.05$ , cluster-corrected, generalized psycho-  
880 physiological interaction or gPPI) superimposed onto an anatomical template. Coronal slices (4.0  
881 mm apart) are shown from anterior (top left) to posterior (bottom right) planes.

882

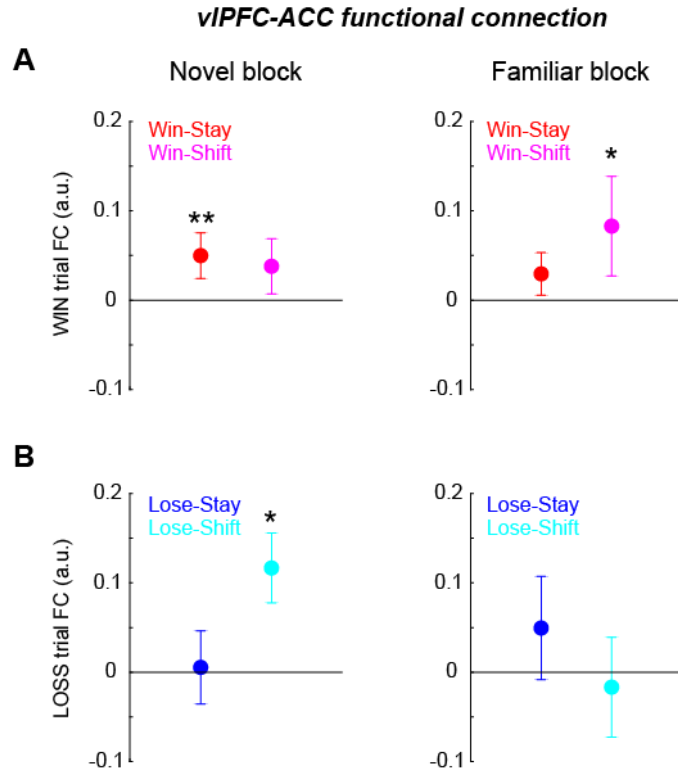

883

884 **Supplementary Figure 4. The impact of outcome and stay/shift decision on vIPFC-ACC**  
885 **functional connection.** The average FC between vIPFC and ACC around the timing of outcome  
886 (-2 to +2 seconds after outcome) are plotted for win-stay and win-shift trials (A) and lose-stay  
887 and lose-shift trials (B) for novel (left) and familiar (right) blocks, respectively. Error bars  
888 indicate SEM. Asterisks indicate significant FC changes from zero (\*\* $p < 0.01$  or \* $p < 0.05$ ,  
889 rank-sum test).

890

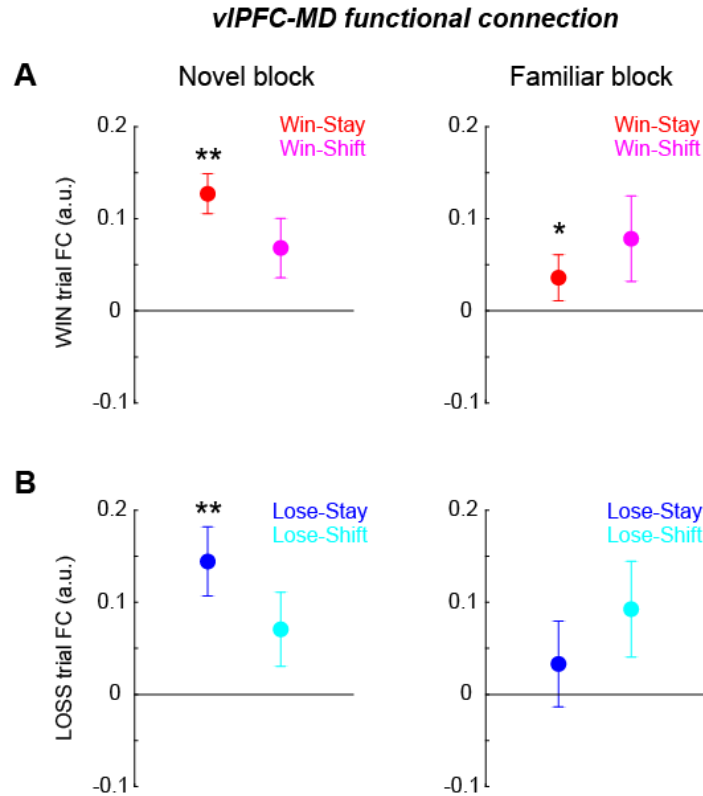

891

892 **Supplementary Figure 5. Functional connection between vIPFC and MD thalamus around**  
893 **the outcome timing.** (A, B) The average FC between vIPFC and MD around the timing of  
894 outcome are plotted for novel (left) and familiar (right) blocks, respectively. The conventions are  
895 the same as Figure S4. Asterisks indicate significant FC changes from zero (\*\* $p < 0.01$  or \* $p <$   
896  $0.05$ , rank-sum test).

897

| Area          | Peak coordinates |       |       | #voxels |
|---------------|------------------|-------|-------|---------|
|               | x                | y     | z     |         |
| V4            | -22.5            | +7.6  | +7.9  | 236     |
| Medulla       | -4.5             | +6.1  | -7.1  | 54      |
| Precuneus     | +3.0             | +3.1  | +28.9 | 53      |
| V2            | +24.0            | +9.1  | +15.4 | 36      |
| Somatosensory | +15.0            | +3.1  | +30.4 | 26      |
| vIPFC         | -16.5            | -26.9 | +13.9 | 23      |
| V6A           | +1.5             | +12.1 | +27.4 | 23      |
| dACC          | +1.5             | -29.9 | +24.4 | 23      |
| Premotor      | -22.5            | -23.9 | +24.4 | 21      |
| dIPFC         | +12.0            | -32.9 | +31.9 | 21      |
| Somatosensory | -15.0            | -11.9 | +25.9 | 19      |
| SMA           | 0.0              | -32.9 | +30.4 | 18      |
| Pons          | -4.5             | -1.4  | +0.4  | 17      |
| vIPFC         | -13.5            | -34.4 | +24.4 | 17      |
| V2            | -10.5            | +0.1  | +12.4 | 17      |
| V1            | +15.0            | +12.1 | +13.9 | 17      |
| Auditory      | -24.0            | -19.4 | +13.9 | 17      |
| vIPFC         | +18.0            | -26.9 | +18.4 | 16      |
| Precuneus     | +1.5             | +4.6  | +21.4 | 16      |
| PCC           | -4.5             | -2.9  | +27.4 | 16      |
| TE            | +15.0            | -22.4 | +0.4  | 15      |
| TE            | -21.0            | -7.4  | +4.9  | 15      |
| dIPFC         | +13.5            | -29.9 | +27.4 | 15      |
| Auditory      | +24.0            | -14.9 | +12.4 | 15      |
| TEO           | +25.5            | -1.4  | +12.4 | 14      |
| V3            | +19.5            | +10.6 | +24.4 | 14      |
| Cerebellum    | +3.0             | +19.6 | +6.4  | 14      |
| Precuneus     | -3.0             | +9.1  | +25.9 | 14      |

898

899 **Supplementary Table 1. Full list of clusters in the whole-brain analysis that encoded**  
 900 **learning context and reward outcome.** dIPFC: dorsolateral prefrontal cortex, vIPFC:



901 ventrolateral prefrontal cortex, V1: primary visual cortex, V2: secondary visual cortex, V3: third  
902 visual cortex, V4: fourth visual cortex, TE: anterior inferotemporal cortex, TEO: posterior  
903 inferotemporal cortex, dACC: dorsal anterior cingulate cortex, PCC: posterior cingulate cortex.

904

| Area          | Peak coordinates |       |       | #voxels |
|---------------|------------------|-------|-------|---------|
|               | x                | y     | z     |         |
| Pons          | +1.5             | -7.4  | -1.1  | 63      |
| dIPFC         | +7.5             | -35.9 | +31.9 | 40      |
| Somatosensory | +6.0             | +7.6  | +34.9 | 37      |
| Premotor      | 0.0              | -22.4 | +36.4 | 29      |
| Premotor      | -9.0             | -19.4 | +36.4 | 27      |
| Cerebellum    | -3.0             | +4.6  | +1.9  | 25      |
| V2            | -3.0             | +10.6 | +19.9 | 24      |
| MD thalamus   | +3.0             | +10.4 | +19.9 | 22      |
| V1            | +7.5             | +19.6 | +16.9 | 21      |
| Medulla       | +1.5             | +1.6  | -7.1  | 19      |
| V1            | -9.0             | +16.6 | +28.9 | 19      |
| V2            | +9.0             | +13.6 | +24.4 | 17      |
| Premotor      | +21.0            | -23.9 | +21.4 | 15      |
| V1            | -12.0            | +19.6 | +4.9  | 14      |
| dACC          | -4.5             | -34.4 | +25.9 | 14      |

905

906 **Supplementary Table 2. Full list of clusters in the functional connectivity (gPPI) analysis**  
907 **that encoded learning context in relation to right vIPFC seed timeseries.** dIPFC: dorso-lateral  
908 prefrontal cortex, V1: primary visual cortex, V2: secondary visual cortex, dACC: dorsal anterior  
909 cingulate cortex.
